# Supplementary material for: Association of Objectively Measured Physical Activity With Cardiovascular Risk in Mobility‐limited Older Adults
Source: PubMed Central journal article supplement — J Am Heart Assoc. 2015 Feb 18;4(2):e001288. doi: 10.1161/JAHA.114.001288 (PMC4345863; doi:10.1161/jaha.114.001288), 2015-02-18
Supplement: jah3-4-e001288-s1.pdf [file jah3-4-e001288-s1.pdf]

## **Research Investigators for the LIFE Study:**

### **Administrative Coordinating Center, University of Florida, Gainesville, FL**

Marco Pahor, MD – Principal Investigator of the LIFE Study

Jack M. Guralnik, MD, PhD – Co-Investigator of the LIFE Study (University of Maryland School of Medicine, Baltimore, MD)

Christiaan Leeuwenburgh, PhD

Connie Caudle

Lauren Crump, MPH

Latonia Holmes

Jocelyn Lee, PhD

Ching-ju Lu, MPH

### **Data Management, Analysis and Quality Control Center, Wake Forest University, Winston Salem, NC**

Michael E. Miller, PhD – DMAQC Principal Investigator

Mark A. Espeland, PhD – DMAQC Co-Investigator

Walter T. Ambrosius, PhD

William Applegate, MD

Daniel P. Beavers, PhD, MS

Robert P. Byington, PhD, MPH, FAHA

Delilah Cook, CCRP

Curt D. Furberg, MD, PhD

Lea N. Harvin, BS

Leora Henkin, MPH, Med

John Hepler, MA

Fang-Chi Hsu, PhD

Laura Lovato, MS

Wesley Roberson, BSBA

Julia Rushing, BSPH, MStat

Scott Rushing, BS

Cynthia L. Stowe, MPM

Michael P. Walkup, MS

Don Hire, BS

W. Jack Rejeski, PhD

Jeffrey A. Katula, PhD, MA

Peter H. Brubaker, PhD

Shannon L. Mihalko, PhD

Janine M. Jennings, PhD

### **National Institutes of Health, Bethesda, MD**

Evan C. Hadley, MD (National Institute on Aging)

Sergei Romashkan, MD, PhD (National Institute on Aging)

Denise E. Bonds, MD, MPH (National Heart, Lung and Blood Institute)

Kushang V. Patel, PhD (National Institute on Aging)

### **Field Centers**

#### **Northwestern University, Chicago, IL**

Mary M. McDermott, MD – Field Center Principal Investigator

Bonnie Spring, PhD – Field Center Co-Investigator

Joshua Hauser, MD – Field Center Co-Investigator

Diana Kerwin, MD – Field Center Co-Investigator

Kathryn Domanchuk, BS  
Rex Graff, MS  
Alvito Rego, MA

**Pennington Biomedical Research Center, Baton Rouge, LA**

Timothy S. Church, MD, PhD, MPH – Field Center Principal Investigator  
Steven N. Blair, PED (University of South Carolina)  
Valerie H. Myers, PhD  
Ron Monce, PA-C  
Nathan E. Britt, NP  
Melissa Nauta Harris, BS  
Ami Parks McGucken, MPA, BS  
Ruben Rodarte, MBA, MS, BS  
Heidi K. Millet, MPA, BS  
Catrine Tudor-Locke, PhD, FACSM  
Ben P. Butitta, BS  
Sheletta G. Donatto, MS, RD, LDN, CDE  
Shannon H. Cocreham, BS

**Stanford University, Palo Alto, CA**

Abby C. King, PhD – Field Center Principal Investigator  
Cynthia M. Castro, PhD William L. Haskell, PhD  
Randall S. Stafford, MD, PhD Leslie A. Pruitt, PhD  
Kathy Berra, MSN, NP-C, FAAN  
Veronica Yank, MD

**Tufts University, Boston, MA**

Roger A. Fielding, PhD – Field Center Principal Investigator  
Miriam E. Nelson, PhD – Field Center Co-Investigator  
Sara C. Folta, PhD – Field Center Co-Investigator  
Edward M. Phillips, MD  
Christine K. Liu, MD  
Erica C. McDavitt, MS  
Kieran F. Reid, MSc, MPH  
Won S. Kim, BS  
Vince E. Beard, BS

**University of Florida, Gainesville, FL**

Todd M. Manini, PhD – Field Center Principal Investigator  
Marco Pahor, MD – Field Center Co-Investigator  
Stephen D. Anton, PhD  
Susan Nayfield, MD  
Thomas W. Buford, PhD  
Michael Marsiske, PhD  
Bhanuprasad D. Sandesara, MD  
Jeffrey D. Knaggs, BS  
Megan S. Lorow, BS  
William C. Marena, MT, CCRC  
Irina Korytov, MD  
Holly L. Morris, MSN, RN, CCRC (Brooks Rehabilitation Clinical Research Center, Jacksonville, FL)  
Margo Fitch, PT (Brooks Rehabilitation Clinical Research Center, Jacksonville, FL)  
Floris F. Singletary, MS, CCC-SLP (Brooks Rehabilitation Clinical Research Center, Jacksonville, FL)

Jackie Causer, BSH, RN (Brooks Rehabilitation Clinical Research Center, Jacksonville, FL)  
Katie A. Radcliff, MA (Brooks Rehabilitation Clinical Research Center, Jacksonville, FL)

**University of Pittsburgh, Pittsburgh, PA**

Anne B. Newman, MD, MPH – Field Center Principal Investigator  
Stephanie A. Studenski, MD, MPH – Field Center Co-Investigator  
Bret H. Goodpaster, PhD  
Nancy W. Glynn, PhD  
Oscar Lopez, MD  
Neelesh K. Nadkarni, MD, PhD  
Kathy Williams, RN, BSEd, MHSA  
Mark A. Newman, PhD  
George Grove, MS  
Janet T. Bonk, MPH, RN  
Jennifer Rush, MPH  
Piera Kost, BA (deceased)  
Diane G. Ives, MPH

**Wake Forest University, Winston Salem, NC**

Stephen B. Kritchevsky, Ph.D. – Field Center Principal Investigator  
Anthony P. Marsh, PhD – Field Center Co-Investigator  
Tina E. Brinkley, PhD  
Jamehl S. Demons, MD  
Kaycee M. Sink, MD, MAS  
Kimberly Kennedy, BA, CCRC  
Rachel Shertzer-Skinner, MA, CCRC  
Abbie Wrights, MS  
Rose Fries, RN, CCRC  
Deborah Barr, MA, RHed, CHES

**Yale University, New Haven, CT**

Thomas M. Gill, MD – Field Center Principal Investigator  
Robert S. Axtell, PhD, FACSM – Field Center Co-Investigator (Southern Connecticut State University, Exercise Science Department)  
Susan S. Kashaf, MD, MPH (VA Connecticut Healthcare System)  
Nathalie de Rekeneire, MD, MS  
Joanne M. McGloin, MDiv, MS, MBA  
Karen C. Wu, RN  
Denise M. Shepard, RN, MBA  
Barbara Fennelly, MA, RN  
Lynne P. Iannone, MS, CCRP  
Raeleen Mautner, PhD  
Theresa Sweeney Barnett, MS, APRN  
Sean N. Halpin, MA  
Matthew J. Brennan, MA  
Julie A. Bugaj, MS  
Maria A. Zenoni, MS  
Bridget M. Mignosa, AS

**Cognition Coordinating Center, Wake Forest University, Winston Salem, NC**

Jeff Williamson, MD, MHS – Center Principal Investigator  
Kaycee M Sink, MD, MAS – Center Co-Investigator

Hugh C. Hendrie, MB, ChB, DSc (Indiana University)  
Stephen R. Rapp, PhD  
Joe Verghese, MB, BS (Albert Einstein College of Medicine of Yeshiva University)  
Nancy Woolard  
Mark Espeland, PhD  
Janine Jennings, PhD

**Electrocardiogram Reading Center, University of Florida, Gainesville, FL**

Carl J. Pepine MD, MACC  
Mario Ariet, PhD  
Eileen Handberg, PhD, ARNP  
Daniel Deluca, BS  
James Hill, MD, MS, FACC  
Anita Szady, MD

**Spirometry Reading Center, Yale University, New Haven, CT**

Geoffrey L. Chupp, MD  
Gail M. Flynn, RCP, CRFT  
Thomas M. Gill, MD  
John L. Hankinson, PhD (Hankinson Consulting, Inc.)  
Carlos A. Vaz Fragoso, MD

**Cost Effectiveness Analysis Center**

Erik J. Groessl, PhD (University of California, San Diego and VA San Diego Healthcare System)  
Robert M. Kaplan, PhD (Office of Behavioral and Social Sciences Research, National Institutes of Health)
